# Supplementary material for: Soil Quality Restoration during the Natural Succession of Abandoned Cattle Pastures in Deforested Landscapes in the Colombian Amazon
Source: MDPI journal article supplement (doi:10.3390/agronomy11122484), 2021-12-07
Supplement: s1 [file s1]

# **Soil Quality Restoration during the Natural Succession of Abandoned Cattle Pastures in Deforested Landscapes in the Colombian Amazon**

**Carlos H. Rodríguez-León <sup>1,2</sup>, Clara P. Peña-Venegas <sup>3,\*</sup>, Armando Sterling <sup>2</sup>, Daniel Castro <sup>3</sup>,  
Lizeth K. Mahecha-Virguez <sup>2</sup>, Yeny R. Virguez-Díaz <sup>2</sup> and Adriana M. Silva-Olaya <sup>4</sup>**

<sup>1</sup> Doctoral Program in Natural Sciences and Sustainable Development, Faculty of Agricultural Sciences, Universidad de la Amazonía, Florencia 180001, Caquetá, Colombia; crodriguez@sinchi.org.co

<sup>2</sup> Laboratory of Phytopathology, Amazonian Scientific Research Institute Sinchi–Faculty of Basic Sciences, Universidad de la Amazonía, Florencia 180001, Caquetá, Colombia; asterling@sinchi.org.co (A.S.); karinamahechavirguez1999@gmail.com (L.K.M.-V.); ynyro-17@hotmail.com (Y.R.V.-D.)

<sup>3</sup> Laboratory of Microbiology, Amazonian Scientific Research Institute Sinchi, Leticia 910001, Amazonas, Colombia; danielkaz80@gmail.com

<sup>4</sup> Laboratory of Biogeochemical Processes, Amazonian Research Center CIMAZ-MACAGUAL, Universidad de la Amazonía, Florencia 180001, Caquetá, Colombia; adr.silva@udla.edu.co

\* Correspondence: cpena@sinchi.org.co; Tel.: +57-3108149907

## Supplementary Figures

(a) Macrofauna communities

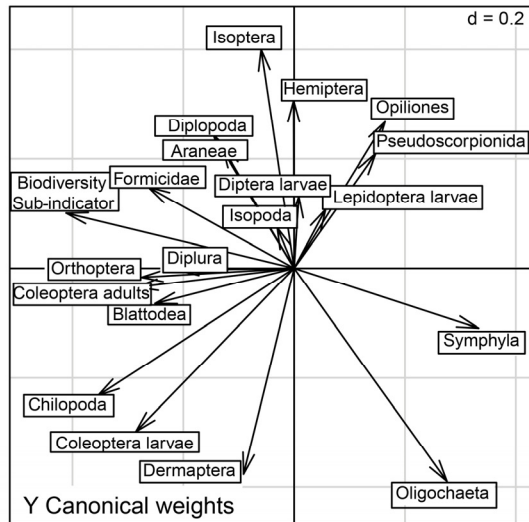

(b) Soil macroaggregates

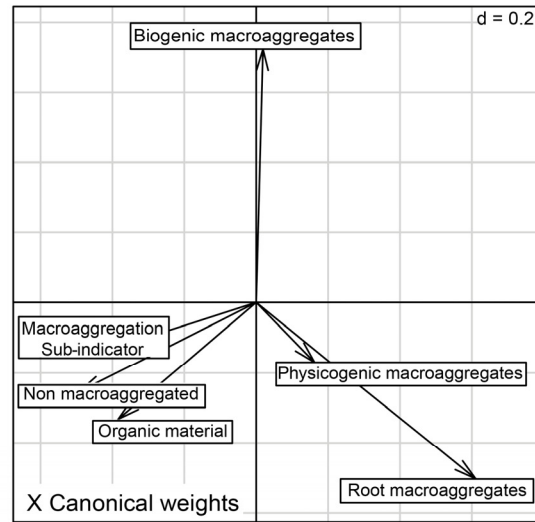

**Figure S1.** Coinertia analysis PC1/PC2 plane with the projection of macrofauna communities (a) and soil macroaggregates (b).

(a) Macrofauna communities

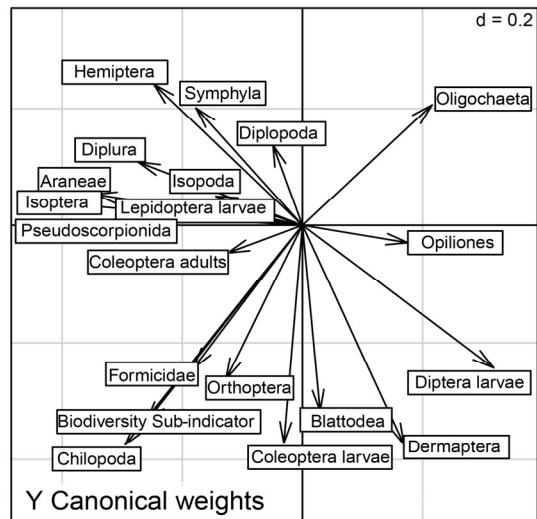

(b) Soil physical properties

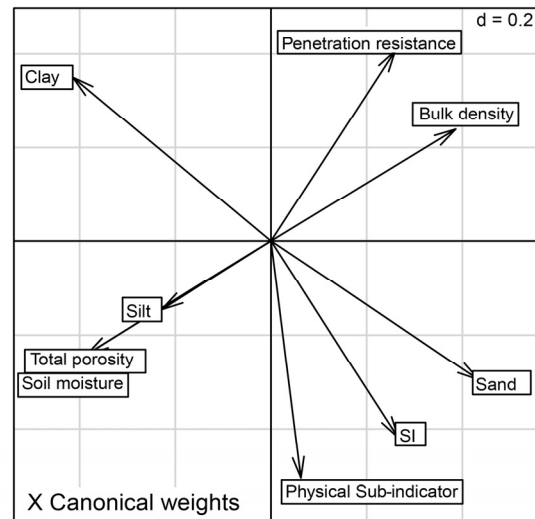

**Figure S2.** Coinertia analysis PC1/PC2 plane with the projection of macrofauna communities (a) and soil physical properties (b).

(a) Macrofauna communities

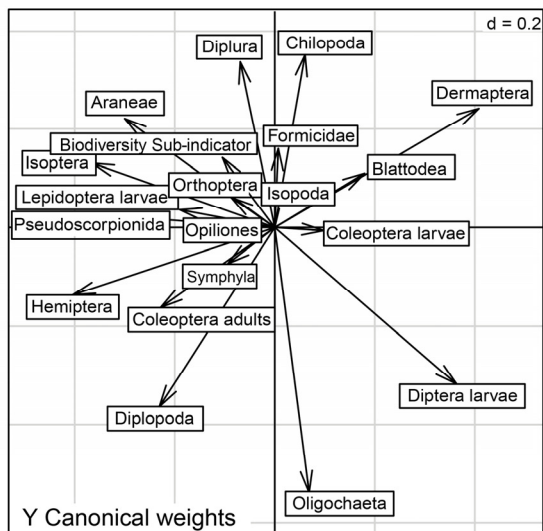

(b) Soil chemical properties

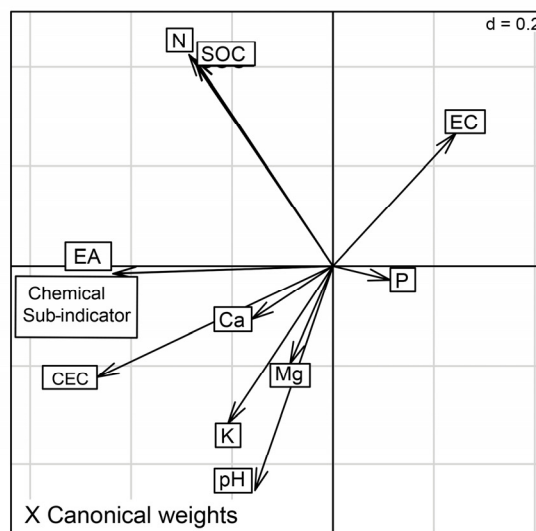

**Figure S3.** Coinertia analysis PC1/PC2 plane with the projection of macrofauna communities (a) and soil chemical properties (b).

(a) Soil chemical properties

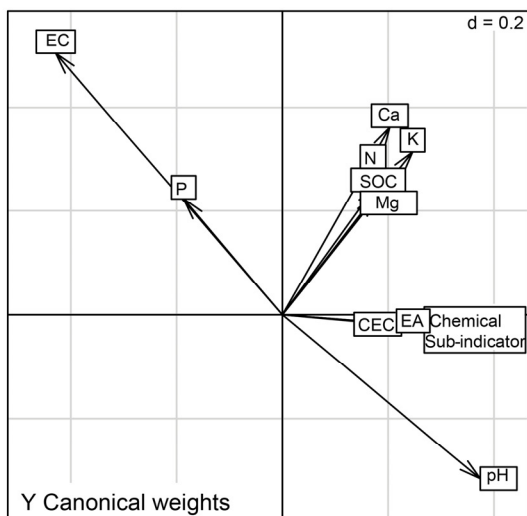

(b) Soil macroaggregates

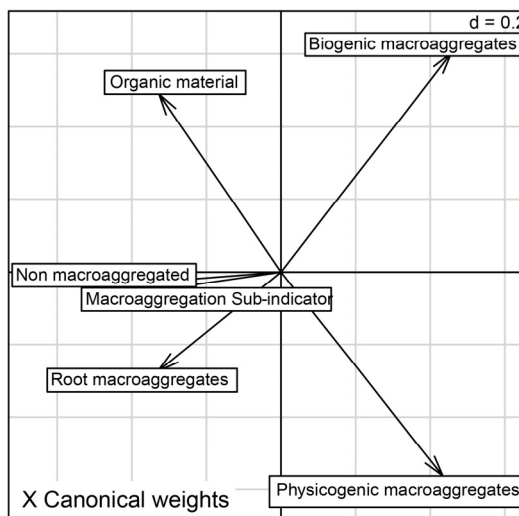

**Figure S4.** Coinertia analysis PC1/PC2 plane with the projection of soil chemical properties (a) and soil macroaggregates (b).

(a) Soil chemical properties

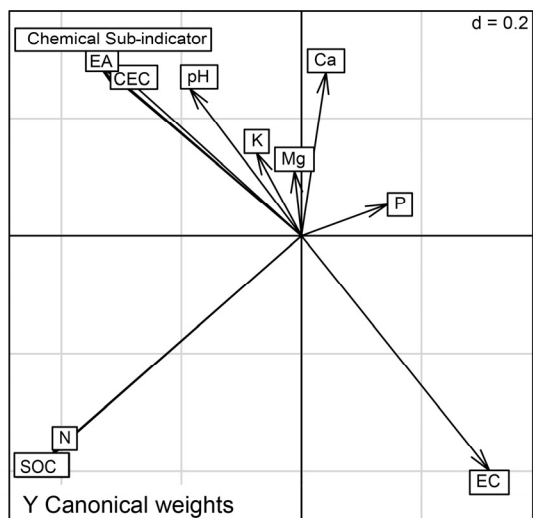

(b) Soil physical properties

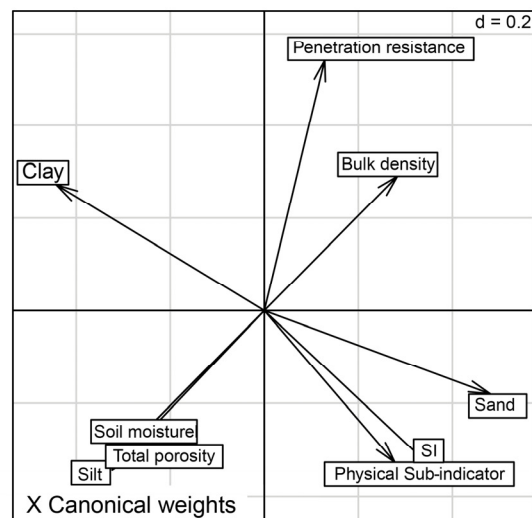

**Figure S5.** Coinertia analysis PC1/PC2 plane with the projection of soil chemical properties (a) and soil physical properties (b).

(a) Soil physical properties

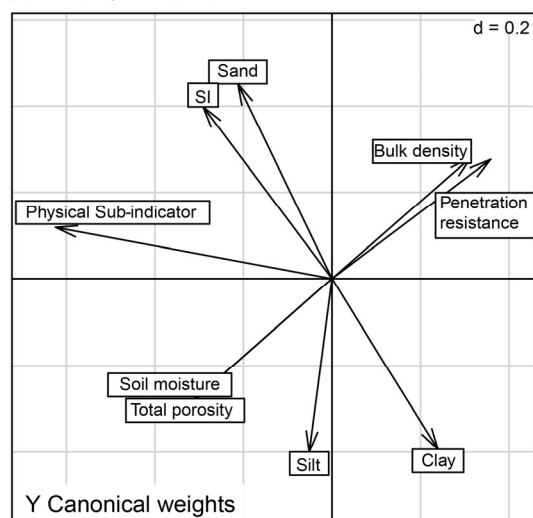

(b) Soil macroaggregates

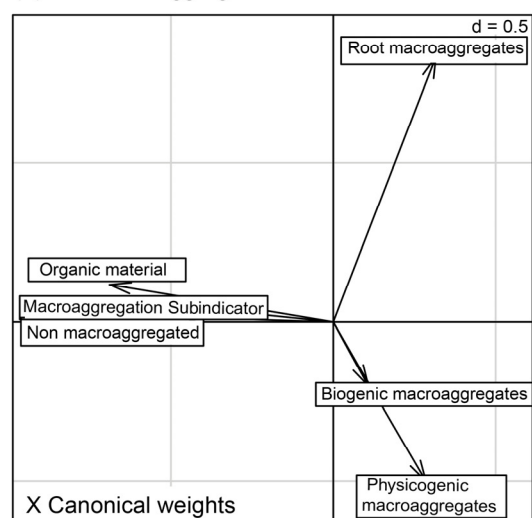

**Figure S6.** Coinertia analysis PC1/PC2 plane with the projection of soil physical properties (a) and soil macroaggregates (b).

## Supplementary Tables

**Table S1.** Details of plots and soil samples collected and analyzed.

| Municipality           | Location             | N           | W            | Ecosystem   | Landscape | Chronosequence   | Plot | No. soil macrofauna samples | No. soil macroaggregation samples | <sup>a</sup> No. soil physical samples | <sup>b</sup> No. soil chemical samples |
|------------------------|----------------------|-------------|--------------|-------------|-----------|------------------|------|-----------------------------|-----------------------------------|----------------------------------------|----------------------------------------|
| Morelia                | Caldas               | 1°30'31.41" | 75°44'9.57"  | Disturbed   | Hill      | Degraded pasture | DM11 | 20                          | 5                                 | 3                                      | 3                                      |
| Belén de los Andaquíes | Aletones             | 1°29'32.57" | 75°52'20.63" | Disturbed   | Hill      | Degraded pasture | DM15 | 20                          | 5                                 | 3                                      | 3                                      |
| Florencia              | Bajo caldas          | 1°39'39.45" | 75°37'54.36" | Disturbed   | Hill      | Degraded pasture | DM6  | 20                          | 5                                 | 3                                      | 3                                      |
| Morelia                | Caldas               | 1°30'36.47" | 75°44'35.56" | Disturbed   | Hill      | 10–20            | DM10 | 20                          | 5                                 | 3                                      | 3                                      |
| Florencia              | Bajo caldas          | 1°38'53.46  | 75°38'9.79"  | Disturbed   | Hill      | 10–20            | DM16 | 20                          | 5                                 | 3                                      | 3                                      |
| Florencia              | Palmichal            | 1°42'27.6"  | 75°35'59.8"  | Disturbed   | Hill      | 10–20            | DM2  | 20                          | 5                                 | 3                                      | 3                                      |
| Florencia              | Palmichal            | 1°43'1.70"  | 75°36'45.40" | Disturbed   | Hill      | 10–20            | DM1  | 20                          | 5                                 | 3                                      | 3                                      |
| Morelia                | Caldas               | 1°30'37.05" | 75°44'27.01" | Disturbed   | Hill      | 25–40            | DM12 | 20                          | 5                                 | 3                                      | 3                                      |
| San José del Fragua    | Bellavista           | 1°19'16.21" | 76°00'21.30" | Disturbed   | Hill      | 25–40            | DM13 | 20                          | 5                                 | 3                                      | 3                                      |
| Belén de los Andaquíes | El chocho            | 1°27'20.25" | 75°48'43.93" | Disturbed   | Hill      | 25–40            | DM14 | 20                          | 5                                 | 3                                      | 3                                      |
| Belén de los Andaquíes | San Antonio de Padua | 1°29'24.66" | 75°53'23.74" | Disturbed   | Hill      | 25–40            | DM17 | 20                          | 5                                 | 3                                      | 3                                      |
| Florencia              | Bajo caldas          | 1°39'23.7"  | 75°38'6.0"   | Disturbed   | Hill      | 25–40            | DM7  | 20                          | 5                                 | 3                                      | 3                                      |
| Belén de los Andaquíes | San Antonio de Padua | 1°29'26.91" | 75°53'40.34" | Disturbed   | Hill      | 25–40            | DM8  | 20                          | 5                                 | 3                                      | 3                                      |
| Belén de los Andaquíes | El porvenir          | 1°28'22.9"  | 75°52'6.7"   | Undisturbed | Hill      | Forest           | RM11 | 20                          | 5                                 | 3                                      | 3                                      |
| San José del Fragua    | Bellavista           | 1°18'52.2"  | 76°00'53.6"  | Undisturbed | Hill      | Forest           | RM13 | 20                          | 5                                 | 3                                      | 3                                      |
| Belén de los Andaquíes | Chocho alto          | 1°27'38.2"  | 75°48'28.4"  | Undisturbed | Hill      | Forest           | RM14 | 20                          | 5                                 | 3                                      | 3                                      |
| Florencia              | Bajo caldas          | 1°39'17.9"  | 75°38'26.6"  | Undisturbed | Hill      | Forest           | RM3  | 20                          | 5                                 | 3                                      | 3                                      |

|                        |               |             |              |             |          |                  |      |    |   |   |   |
|------------------------|---------------|-------------|--------------|-------------|----------|------------------|------|----|---|---|---|
| Florencia              | Caraño        | 1°44'38.4"  | 75°39'34.2"  | Undisturbed | Hill     | Forest           | RM8  | 20 | 5 | 3 | 3 |
| Belén de los Andaquíes | El porvenir   | 1°28'32.7"  | 75°52'3.8"   | Undisturbed | Hill     | Forest           | RM9  | 20 | 5 | 3 | 3 |
| Morelia                | Caldas        | 1°24'13.68" | 75°45'9.24"  | Disturbed   | Mountain | Degraded pasture | DL11 | 20 | 5 | 3 | 3 |
| Morelia                | Morelia       | 1°20'10.96" | 75°41'55.32" | Disturbed   | Mountain | Degraded pasture | DL10 | 20 | 5 | 3 | 3 |
| Morelia                | San Marcos    | 1°23'9.3"   | 75°39'10.38" | Disturbed   | Mountain | 10–20            | DL12 | 20 | 5 | 3 | 3 |
| Morelia                | Lagunilla     | 1°26'23.6"  | 75°39'20.4"  | Disturbed   | Mountain | 10–20            | DL2  | 20 | 5 | 3 | 3 |
| Belén de los Andaquíes | Puerto Torres | 1°15'59.9"  | 75°47'23.4"  | Disturbed   | Mountain | 10–20            | DL6  | 20 | 5 | 3 | 3 |
| Morelia                | San Marcos    | 1°23'24.2"  | 75°39'4.0"   | Disturbed   | Mountain | 25–40            | DL13 | 20 | 5 | 3 | 3 |
| Florencia              | Balcanes      | 1°26'39.1"  | 75°31'29.1"  | Disturbed   | Mountain | 25–40            | DL16 | 20 | 5 | 3 | 3 |
| Morelia                | Lagunilla     | 1°27'21.63" | 75°39'48.10" | Disturbed   | Mountain | 25–40            | DL3  | 20 | 5 | 3 | 3 |
| Belén de los Andaquíes | El chocho     | 1°25'26.6"  | 75°46'43.27" | Disturbed   | Mountain | 25–40            | DL5  | 20 | 5 | 3 | 3 |
| Belén de los Andaquíes | Puerto Torres | 1°16'8.3"   | 75°47'17.6"  | Disturbed   | Mountain | 25–40            | DL7  | 20 | 5 | 3 | 3 |
| Morelia                | Lagunilla     | 1°26'28.8"  | 75°39'10.3"  | Undisturbed | Mountain | Forest           | RL2  | 20 | 5 | 3 | 3 |
| Morelia                | Lagunilla     | 1°27'27.9"  | 75°39'58.9"  | Undisturbed | Mountain | Forest           | RL3  | 20 | 5 | 3 | 3 |
| San José del Fragua    | El Triunfo    | 1°11'38.4"  | 75°58'19.7"  | Undisturbed | Mountain | Forest           | RL4  | 20 | 5 | 3 | 3 |

<sup>a,b</sup> Soil samples obtained from the pooling of five sampling points (one pooled sample per each soil layer: 0–10, 10–20 and 20–30 cm).

**Table S2.** Density of soil macrofauna communities (individuals·m<sup>-2</sup>) in the 0–30 cm layer for the significant interaction between chronosequence and landscape.

| <b>Landscape</b> | <b>Chronosequence</b> | <b>Araneae</b>    | <b>Coleoptera larvae</b> | <b>Isoptera</b>      | <b>Pseudoscorpionida</b> |
|------------------|-----------------------|-------------------|--------------------------|----------------------|--------------------------|
| Hill             | Degraded pasture      | 8.00 ± 3.35 c     | 16.00 ± 6.74 b           | 364.00 ± 178.10 d    | 32.00 ± 4.00 ab          |
|                  | 10–20                 | 122.67 ± 34.19 ab | 80.00 ± 25.52 a          | 6048.44 ± 2409.88 ab | 32.00 ± 3.27 ab          |
|                  | 25–40                 | 136.00 ± 26.76 a  | 77.33 ± 17.46 a          | 6790.22 ± 1912.99 a  | 29.33 ± 2.21 b           |
|                  | Forest                | 112.00 ± 31.27 ab | 96.00 ± 30.52 a          | 5659.56 ± 2254.97 ab | 18.67 ± 2.49 c           |
| Mountain         | Degraded pasture      | 77.33 ± 21.77 ab  | 106.67 ± 33.86 a         | 1457.00 ± 580.83 c   | 16.00 ± 2.31 c           |
|                  | 10–20                 | 76.00 ± 18.54 ab  | 59.58 ± 16.58 a          | 2201.00 ± 759.69 bc  | 16.00 ± 2.00 c           |
|                  | 25–40                 | 72.00 ± 14.36 b   | 96.00 ± 21.58 a          | 3402.22 ± 958.65 abc | 41.33 ± 2.62 a           |
|                  | Forest                | 104.00 ± 20.56 ab | 114.67 ± 25.71 a         | 4186.67 ± 1179.61 ab | 18.33 ± 1.75 c           |

Values corresponded to mean and standard error. Values in columns followed by the same letter do not differ statistically (Fisher's least significant difference LSD test,  $p < 0.05$ ). Degraded pasture, 10–20 and 25–40: <3, 10–20 and 25–40 years of abandonment, respectively; Forest: Mature forest.
